# Supplementary material for: Crystal structure and centromere binding of the plasmid segregation protein ParB from pCXC100
Source: PubMed Central journal article supplement — Nucleic Acids Res. 2010 Dec 1;39(7):2954–68. doi: 10.1093/nar/gkq915 (PMC3074162; doi:10.1093/nar/gkq915), 2010-12-01
Supplement: supp_gkq915_Supplementary_Material_3ndrevise.pdf [file supp_gkq915_Supplementary_Material_3ndrevise.pdf]

# Crystal structure and centromere binding of the plasmid segregation protein ParB from pCXC100

Lin Huang, Ping Yin, Xing Zhu, Yi Zhang and Keqiong Ye

Supplementary Materials (3 figures and 2 tables)

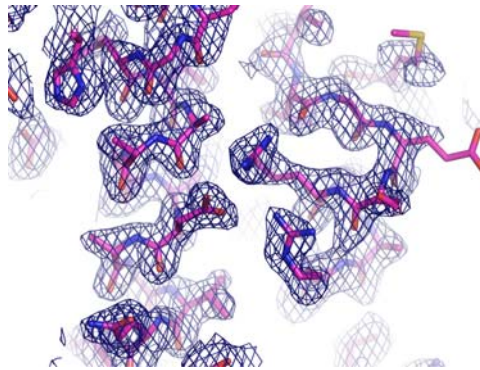

Figure S1. The experimental electron density map resulted from SIRAS phasing, phase extension and solvent modification. The map calculated to 1.9 Å resolution is contoured at  $1\sigma$  and superimposed on the refined structure of the ParB RHH domain.

**Consensus: AGNTGGAAA**

|     |   |   |   |   |   |   |   |   |   |
|-----|---|---|---|---|---|---|---|---|---|
| R1  | A | T | C | C | A | G | T | A | A |
| R2  | A | G | T | A | G | G | A | A | T |
| R3  | A | G | G | T | G | G | A | A | A |
| R4  | A | G | C | C | A | G | A | A | A |
| R5  | C | A | G | T | G | G | G | A | A |
| R6  | A | G | A | T | G | G | G | T | A |
| R7  | A | G | T | G | G | A | A | A | A |
| R8  | A | G | C | T | G | G | A | A | T |
| R9  | T | G | T | T | T | G | C | T | A |
|     |   |   |   |   |   |   |   |   |   |
| R1i | T | A | C | T | G | G | A | T | A |
| R2i | T | T | C | T | A | C | T | T | T |
| R3i | T | T | C | C | A | C | C | T | A |
| R4i | T | T | C | T | G | G | C | T | T |
| R5i | T | C | C | C | A | C | T | G | T |
| R6i | A | C | C | C | A | T | C | T | T |
| R7i | T | T | C | C | C | A | C | T | T |
| R8i | T | T | C | C | A | G | C | T | T |
| R9i | A | G | C | A | A | A | C | A | A |

Figure S2. The centromere core is composed of 9 direct repeats. Repeats R1-R9 and their reverse and complementary sequences R1i-R9i (inverted repeats) are lined up by the ParB binding centers (ellipse). Nucleotides that occur in at least 100%, 75% and 50% direct repeats are shaded in black, gray and light gray, respectively. Nucleotides in inverted repeats conforming to the consensus sequence are shaded similarly as in direct repeats. None of inverted repeats are aligned to the consensus sequence better than their direct counterparts. Only R1 seems to align equally well in either directions.

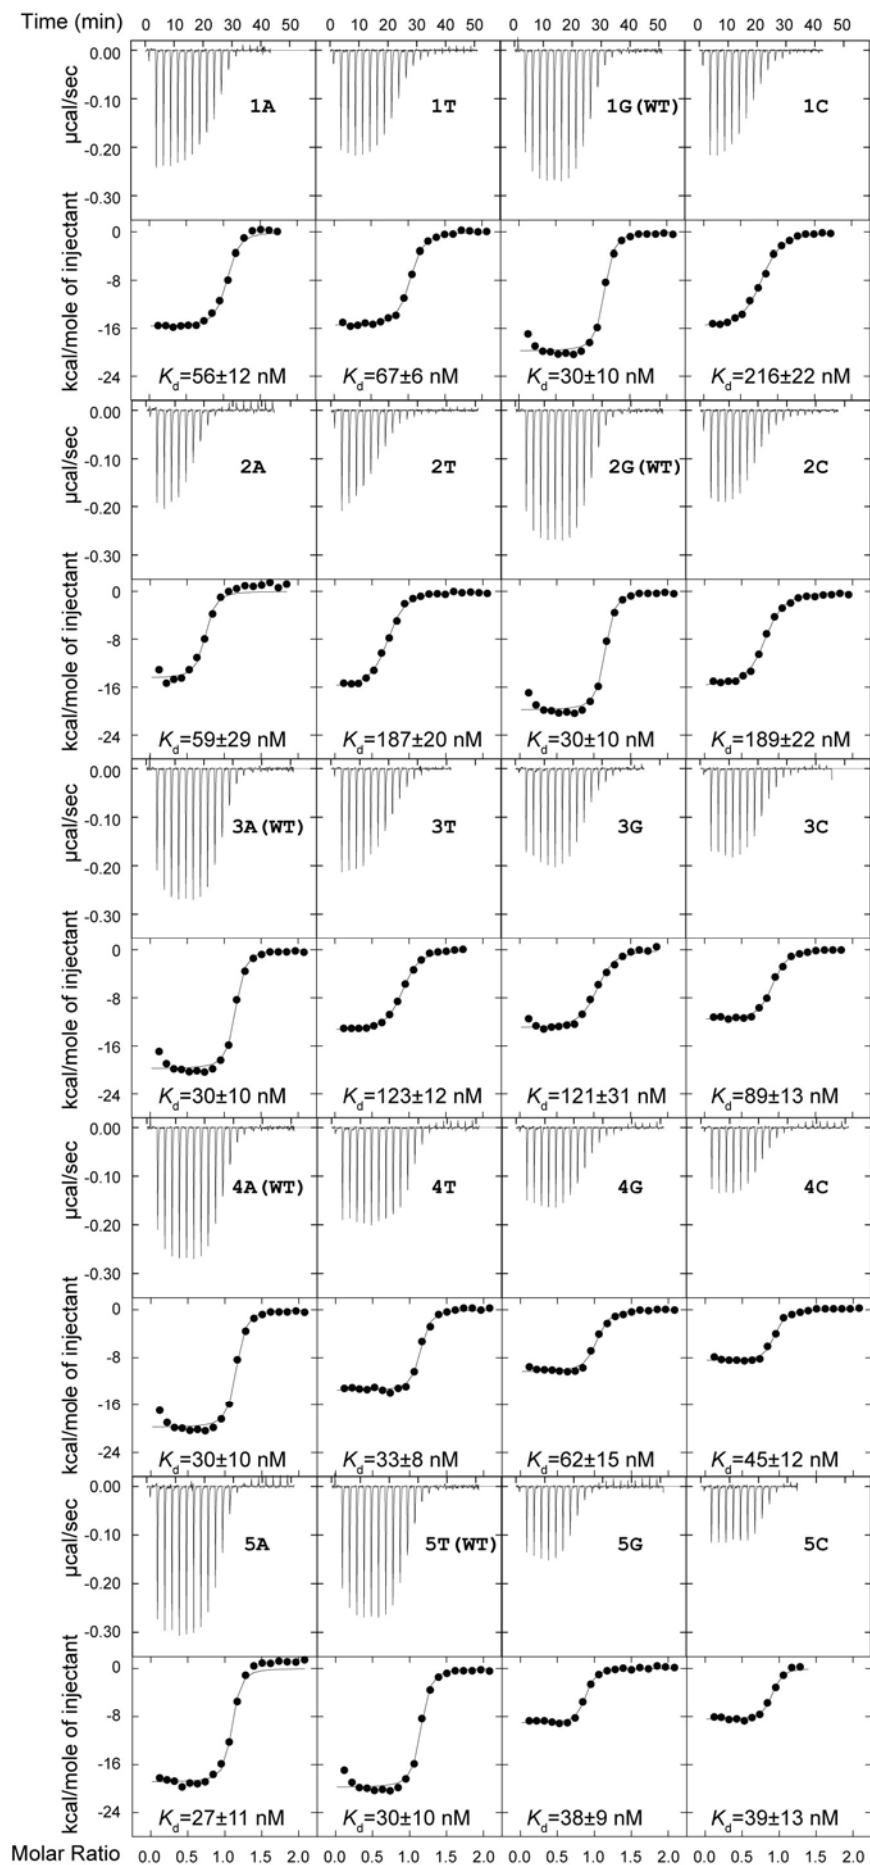

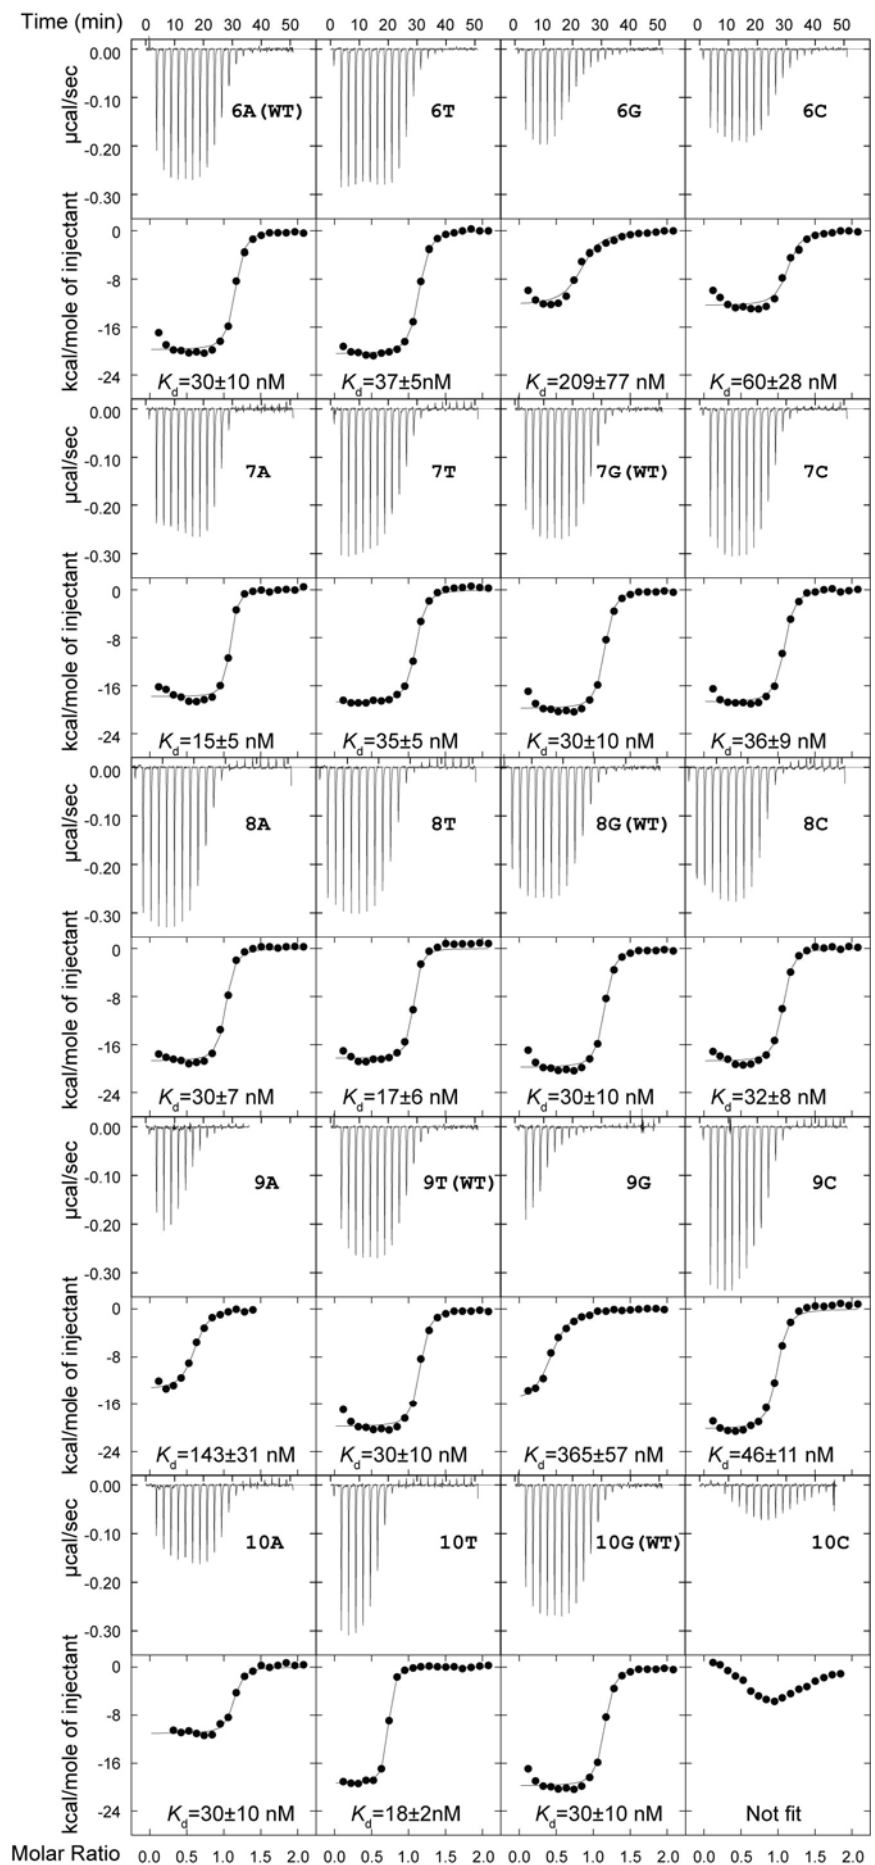

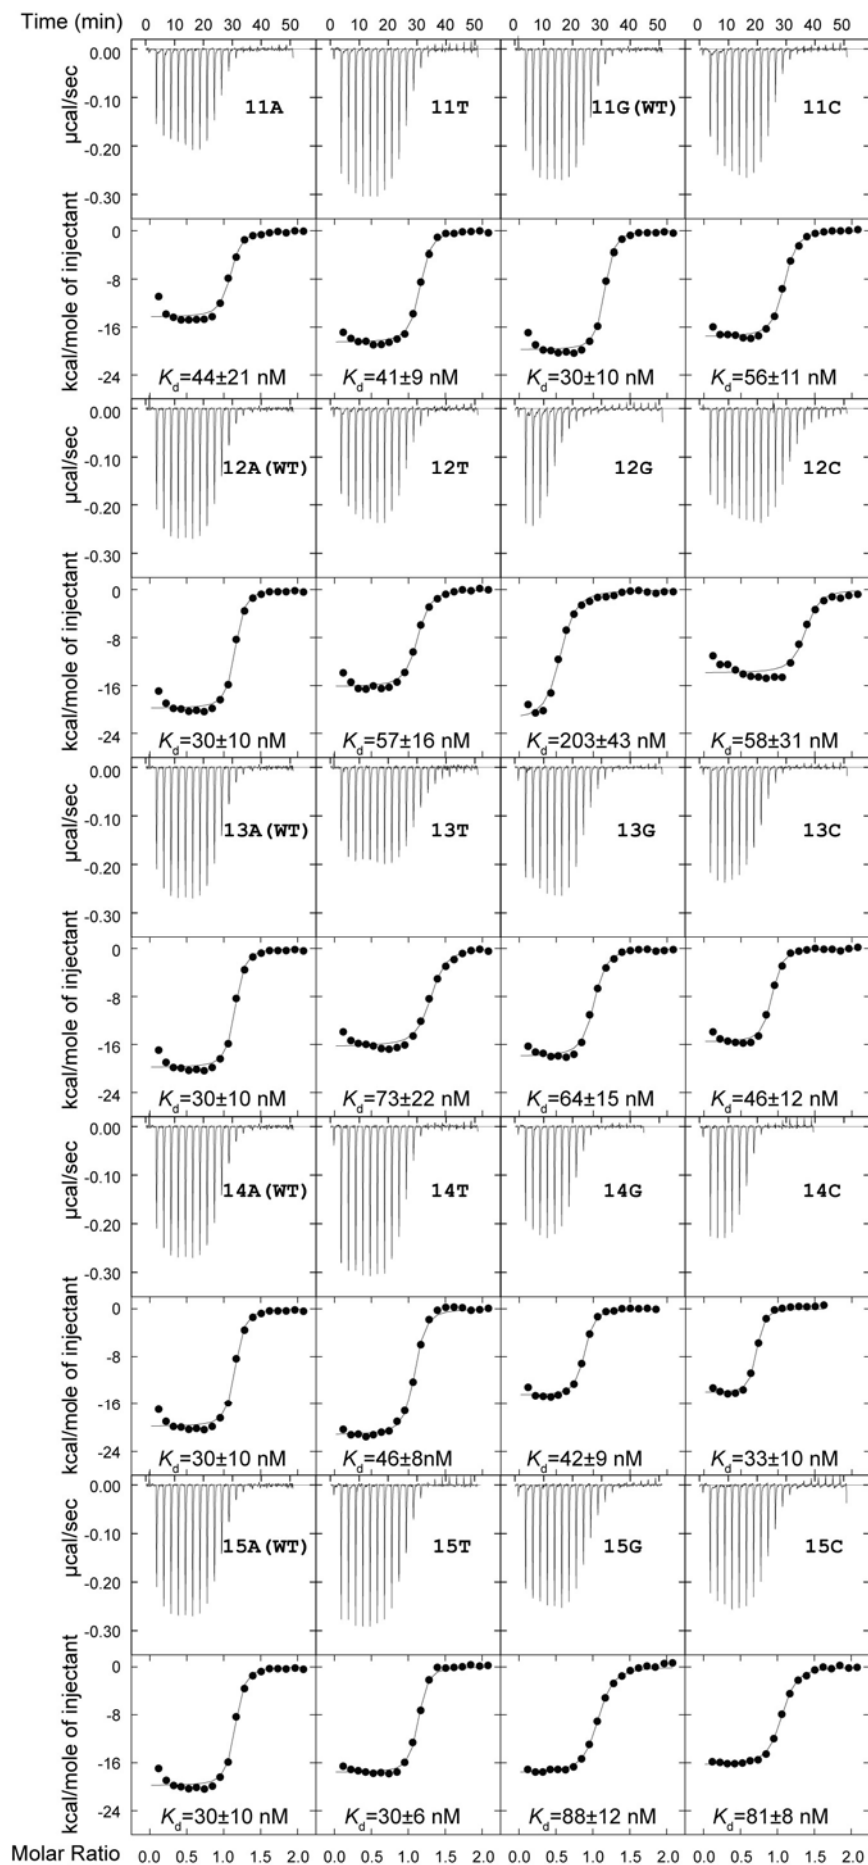

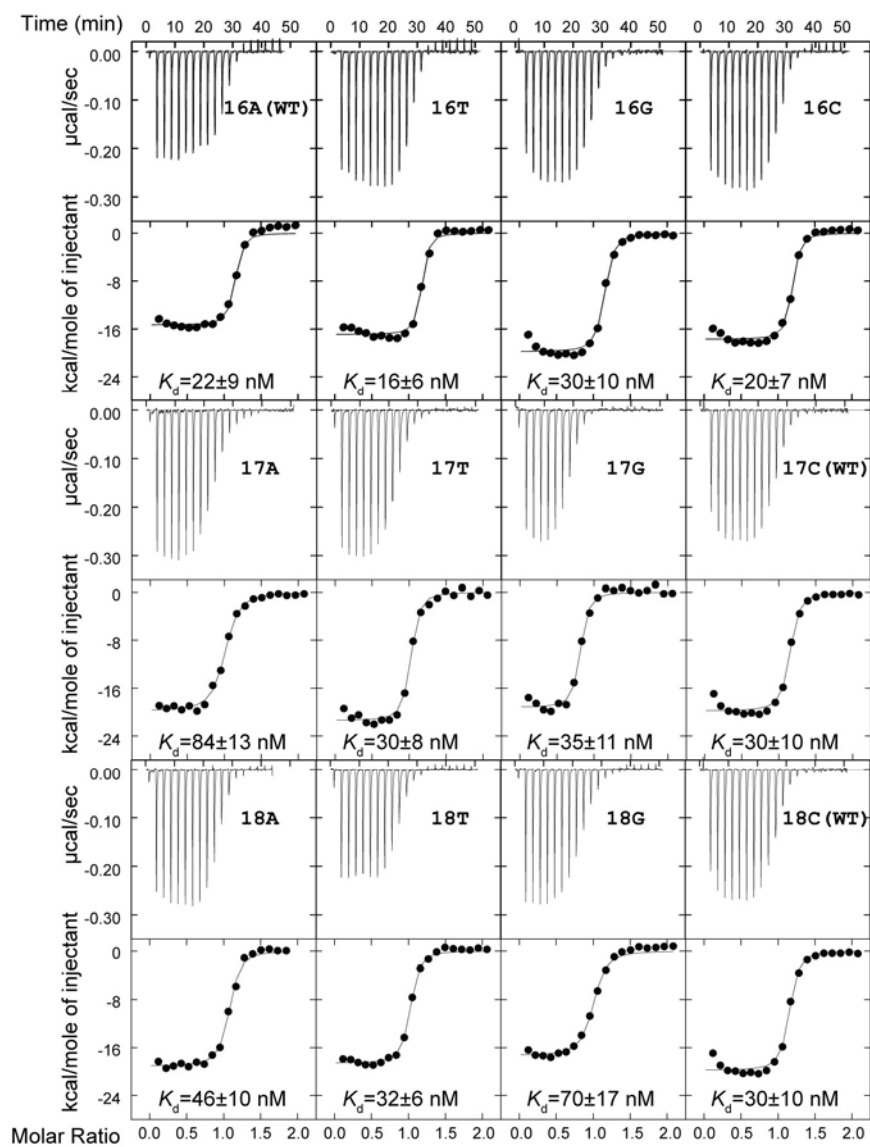

Figure S3. ITC profiles of R3-18 point mutants. Wild type R3-18 was shown in each row for comparison. The curves are the best fit to a one-set-of-sites model.

Table S1. Sequence of the forward strand of double-stranded DNA probes used in this study

| Probe   | Sequence (5'-3')            |
|---------|-----------------------------|
| R3-14   | AATAGGTGGAAAAG              |
| R3-16   | GAATAGGTGGAAAAGC            |
| R3-20   | AGGAATAGGTGGAAAAGCCA        |
| R3-22   | TAGGAATAGGTGGAAAAGCCAG      |
| R4-14   | AAAAGCCAGAAACA              |
| R4-16   | GAAAAGCCAGAAACAG            |
| R4-20   | TGGAAAAGCCAGAAACAGTG        |
| R0-18   | TGCTCGATCTGGCTATCC          |
| R1-18   | TGGCTATCCAGTAAAGTA          |
| R2-18   | AGTAAAGTAGGAATAGGT          |
| R3-18   | GGAATAGGTGGAAAAGCC          |
| R4-18   | GGAAAAGCCAGAAACAGT          |
| R5-18   | AGAAACAGTGGGAAAGAT          |
| R6-18   | GGGAAAGATGGGTAAGTG          |
| R7-18   | GGGTAAGTGGGAAAAGCT          |
| R8-18   | GGAAAAGCTGGAATTGTT          |
| R9-18   | GGAATTGTTTGCTACGGT          |
| R10-18  | TGCTACGGTAGAACACGC          |
| R11-18  | AGAACACGCCGAACGGCC          |
| R4-18-3 | GGTGGAAAAGCCAGAAAC          |
| R4-18-2 | GTGGAAAAGCCAGAAACA          |
| R4-18-1 | TGGAAAAGCCAGAAACAG          |
| R4-18+1 | GAAAAGCCAGAAACAGTG          |
| R4-18+2 | AAAAGCCAGAAACAGTGG          |
| R4-18+3 | AAAGCCAGAAACAGTGGG          |
| R4-18+4 | AAGCCAGAAACAGTGGGA          |
| R2R3-18 | AGTAGGAATAGGTGGAAA          |
| R2R3-27 | AGTAAAGTAGGAATAGGTGGAAAAGCC |
| 1R3'-18 | GGAAAAGGTGGAAAAGGT          |
| 2R3'-27 | GGAAAAGGTGGAAAAGGTGGAAAAGGT |
| 1R6'-18 | GGGTAAGATGGGTAAGAT          |
| 2R6'-27 | GGGTAAGATGGGTAAGATGGGTAAGAT |

Table S2. Thermodynamic parameters of binding of ParB 65-139 to the centromere DNA as determined using ITC.

| Probe    | $n$        | $K$<br>$10^6 \text{ M}^{-1}$ | $K_d$<br>nM | $\Delta H$<br>kcal mol $^{-1}$ | $\Delta S$<br>kcal mol $^{-1} \text{ K}^{-1}$ |
|----------|------------|------------------------------|-------------|--------------------------------|-----------------------------------------------|
| R1-18    | 1.4±0.1    | 1.1±0.7                      | 950±680     | -8±1                           | 1.27                                          |
| R2-18    | 1.0±0.1    | 2.7±0.7                      | 380±100     | -14±1                          | -18.3                                         |
| R3-18    | 1.0±0.1    | 32±12                        | 31±12       | -18±1                          | -25.7                                         |
| R4-18    | 0.9±0.1    | 12±8                         | 87±59       | -12±1                          | -6.7                                          |
| R5-18    | 1.4±0.1    | 1.3±0.5                      | 780±320     | -7±1                           | -4.7                                          |
| R6-18    | 1.2±0.2    | 1.4±1                        | 700±470     | -11±2                          | -8.0                                          |
| R7-18    | Not fit    |                              |             |                                |                                               |
| R8-18    | 1.1±0.1    | 18±4                         | 56±12       | -22±1                          | -39.4                                         |
| R9-18    | 0.8±0.1    | 90±71                        | 11±9        | -17±1                          | -20.2                                         |
| <hr/>    |            |                              |             |                                |                                               |
| R3-14    | 0.7±0.1    | 0.23±0.07                    | 4300±1300   | -10±1                          | -9.1                                          |
| R3-16    | 0.6±0.1    | 2.0±0.3                      | 510±90      | -20±1                          | -38.5                                         |
| R3-18    | 1.0±0.1    | 27±7                         | 37±10       | -19±1                          | -30.6                                         |
| R4-14    | No binding |                              |             |                                |                                               |
| R4-16    | 0.7±0.1    | 1.9±0.2                      | 530±50      | -8±1                           | 2.0                                           |
| R4-18    | 0.9±0.1    | 17±3                         | 60±12       | -13±1                          | -10.9                                         |
| R4-20    | 1.2±0.1    | 15±10                        | 68±48       | -9±1                           | 4.2                                           |
| <hr/>    |            |                              |             |                                |                                               |
| R3-18    | 1.1±0.1    | 33±11                        | 30±10       | -20±1                          | -32.0                                         |
| R3-18-1A | 1.0±0.1    | 18±4                         | 56±12       | -16±1                          | -19.5                                         |
| R3-18-1T | 1.0±0.1    | 15±1                         | 67±6        | -16±1                          | -19.3                                         |
| R3-18-1C | 0.8±0.1    | 5±1                          | 216±22      | -16±1                          | -22.8                                         |
| R3-18-2A | 0.7±0.1    | 17±8                         | 59±29       | -15±1                          | -15.6                                         |
| R3-18-2T | 0.7±0.1    | 5±1                          | 187±20      | -16±1                          | -23.3                                         |
| R3-18-2C | 0.8±0.1    | 5±1                          | 189±22      | -16±1                          | -22.8                                         |
| R3-18-3T | 0.9±0.1    | 8±1                          | 123±12      | -13±1                          | -13.5                                         |
| R3-18-3G | 1.0±0.1    | 8±2                          | 121±31      | -13±1                          | -12.1                                         |
| R3-18-3C | 0.9±0.1    | 11±2                         | 89±13       | -12±1                          | -7.6                                          |
| R3-18-4T | 1.1±0.1    | 30±7                         | 33±8        | -13±1                          | -10.9                                         |
| R3-18-4G | 1.0±0.1    | 16±4                         | 62±15       | -10±1                          | -1.62                                         |
| R3-18-4C | 0.9±0.1    | 22±6                         | 45±12       | -8±1                           | 5.28                                          |
| R3-18-5A | 1.1±0.1    | 37±15                        | 27±11       | -19±1                          | -28.9                                         |
| R3-18-5G | 0.8±0.1    | 26±6                         | 38±9        | -9±1                           | 3.59                                          |
| R3-18-5C | 0.9±0.1    | 25±9                         | 39±13       | -8±1                           | 5.56                                          |
| R3-18-6T | 1.1±0.1    | 27±4                         | 37±5        | -21±1                          | -34.7                                         |
| R3-18-6G | 0.8±0.1    | 5±2                          | 209±77      | -12±1                          | -10.9                                         |
| R3-18-6C | 1.1±0.1    | 17±8                         | 60±28       | -12±1                          | -8.59                                         |
| R3-18-7A | 1.0±0.1    | 66±24                        | 15±5        | -18±1                          | -24.0                                         |
| R3-18-7T | 1.1±0.1    | 29±4                         | 35±5        | -19±1                          | -28.9                                         |



|           |         |       |        |       |       |
|-----------|---------|-------|--------|-------|-------|
| R3-18-7C  | 1.0±0.1 | 28±7  | 36±9   | -19±1 | -28.7 |
| R3-18-8A  | 1.0±0.1 | 33±8  | 30±7   | -19±1 | -28.4 |
| R3-18-8T  | 1.0±0.1 | 58±21 | 17±6   | -18±1 | -25.8 |
| R3-18-8C  | 1.0±0.1 | 32±8  | 32±8   | -19±1 | -28.6 |
| R3-18-9A  | 0.6±0.1 | 7±2   | 143±31 | -13±1 | -13.7 |
| R3-18-9G  | 0.4±0.1 | 3±0.4 | 365±57 | -16±1 | -23.7 |
| R3-18-9C  | 0.9±0.1 | 22±6  | 46±11  | -20±1 | -34.1 |
| R3-18-10A | 1.1±0.1 | 33±11 | 30±10  | -11±1 | -2.61 |
| R3-18-10T | 0.7±0.1 | 54±6  | 18±2   | -19±1 | -28.5 |
| R3-18-10C | Not fit |       |        |       |       |
| R3-18-11A | 1.1±0.1 | 23±11 | 44±21  | -14±1 | -14.3 |
| R3-18-11T | 1.1±0.1 | 24±5  | 41±9   | -19±1 | -28.5 |
| R3-18-11C | 1.0±0.1 | 18±4  | 56±11  | -18±1 | -26   |
| R3-18-12T | 1.1±0.1 | 17±5  | 57±16  | -16±1 | -21.3 |
| R3-18-12G | 0.5±0.1 | 5±1   | 203±43 | -22±1 | -42.8 |
| R3-18-12C | 1.3±0.1 | 17±9  | 58±31  | -14±1 | -13.5 |
| R3-18-13T | 1.3±0.1 | 14±4  | 73±22  | -16±1 | -22.0 |
| R3-18-13G | 1.0±0.1 | 16±4  | 64±15  | -18±1 | -27.4 |
| R3-18-13C | 0.9±0.1 | 22±6  | 46±12  | -16±1 | -18.6 |
| R3-18-14T | 1.0±0.1 | 22±4  | 46±8   | -21±1 | -37.5 |
| R3-18-14G | 0.8±0.1 | 24±5  | 42±9   | -14±1 | -14.6 |
| R3-18-14C | 0.7±0.1 | 30±9  | 33±10  | -14±1 | -12.6 |
| R3-18-15T | 1.1±0.1 | 33±7  | 30±6   | -18±1 | -24.6 |
| R3-18-15G | 1.0±0.1 | 11±2  | 88±12  | -18±1 | -27.1 |
| R3-18-15C | 1.0±0.1 | 12±1  | 81±8   | -16±1 | -22.4 |
| R3-18-16A | 1.1±0.1 | 46±20 | 22±9   | -15±1 | -16.4 |
| R3-18-16T | 1.2±0.1 | 64±24 | 16±6   | -17±1 | -21.0 |
| R3-18-16C | 1.2±0.1 | 50±17 | 20±7   | -18±1 | -24.2 |
| R3-18-17A | 1.0±0.1 | 12±2  | 84±13  | -20±1 | -34.1 |
| R3-18-17T | 1.0±0.1 | 34±10 | 30±8   | -21±1 | -37.4 |
| R3-18-17G | 0.8±0.1 | 29±9  | 35±11  | -19±1 | -30.3 |
| R3-18-18A | 1.0±0.1 | 22±5  | 46±10  | -19±1 | -30.5 |
| R3-18-18T | 1.0±0.1 | 31±6  | 32±6   | -19±1 | -28.1 |
| R3-18-18G | 1.0±0.1 | 14±3  | 70±17  | -17±1 | -25.4 |
| R3-18     | 1.0±0.1 | 34±14 | 29±12  | -18±1 | -24.9 |
| R9-18     | 0.9±0.1 | 59±21 | 17±6   | -21±1 | -33.9 |

The first 9 ITC experiments were performed by titrating 50  $\mu\text{M}$  dimeric ParB 65-139 into 5  $\mu\text{M}$  DNA, and the remaining experiments were performed by titrating 100  $\mu\text{M}$  dimeric ParB 65-139 into 10  $\mu\text{M}$  DNA.

To ensure the consistence of experiment, some titrations, for example R3-18, were performed multiple times with different machines, batches of DNA and experimental settings.

The parameters were derived from fitting of ITC data to a one-set-of-sites model. Errors from fitting are reported.
